# Supplementary material for: siRNA Screen Identifies Trafficking Host Factors that Modulate Alphavirus Infection
Source: PLoS Pathog. 2016 Mar 31;12(3):e1005466. doi: 10.1371/journal.ppat.1005466 (PMC4816540; doi:10.1371/journal.ppat.1005466)
Supplement: S2 Table — For the deconvolution screen, the four individual duplexes siRNAs from each siRNA pool were used. The measured effects of each annotated siRNA duplex on VEEV infection rate and cell number were normalized to that observed with control siRNA. (XLSX) [file ppat.1005466.s002.xlsx]

## Sheet: Table S2
Gene Symbol	Gene ID	Dharmacon Catalogue Number	Normalized Percent Infected Cells	SD	P value	Normalized Cell #	SD
RAC1	5879	J-003560-14	0.643333	0.0493288	0.00238456	1.0591	0.075333
RAC1	5879	J-003560-15	0.846667	0.0378594	0.00763404	1.05707	0.0740419
RAC1	5879	J-003560-16	0.476667	0.0550757	0.00133232	0.97694	0.101082
RAC1	5879	J-003560-17	0.45	0.0781025	0.00358049	0.971499	0.0155207
PIP5K1A	8394	J-004780-09	0.916667	0.0404145	0.0506654	1.12	0.08
PIP5K1A	8394	J-004780-10	0.503333	0.0251661	0.000683227	1.04	0.11
PIP5K1A	8394	J-004780-11	0.656667	0.0929157	0.0155568	1.06	0.09
PIP5K1A	8394	J-004780-12	0.816667	0.0702377	0.0328883	1.11	0.1
ACTR3	10096	J-012077-06	0.39	0.034641	0.000334816	0.971499	0.0155207
ACTR3	10096	J-012077-07	0.546667	0.064291	0.00267076	1.12174	0.0106323
ACTR3	10096	J-012077-08	0.87	0.0556776	0.0266354	1.07988	0.0542148
ACTR3	10096	J-012077-09	0.57	0.0793725	0.00594042	1.14415	0.0518128
ARPC2	10109	J-012081-05	0.315831	0.08971	0.00352045	1.27889	0.0364958
ARPC2	10109	J-012081-06	0.834291	0.0227752	0.00782775	1.11145	0.0538162
ARPC2	10109	J-012081-07	0.78032	0.0900426	0.0365104	1.13661	0.120289
ARPC2	10109	J-012081-08	0.725386	0.0688045	0.00868453	1.0932	0.121485
ARPC4	10093	J-008571-05	0.621333	0.0054672	6.25945e-05	1.04655	0.00528196
ARPC4	10093	J-008571-06	0.74477	0.0635034	0.0154535	0.987284	0.12597
ARPC4	10093	J-008571-07	0.515054	0.0247325	0.000177775	1.13175	0.119263
ARPC4	10093	J-008571-08	0.277474	0.0464023	0.000842415	0.904599	0.116766
ARPC5	10092	J-012080-05	0.656269	0.0921029	0.0157905	1.01202	0.024018
ARPC5	10092	J-012080-06	1.04087	0.0573519	0.126615	1.11667	0.045688
ARPC5	10092	J-012080-07	0.801162	0.0738314	0.0232181	1.02506	0.0520809
ARPC5	10092	J-012080-08	0.533343	0.030329	0.000379223	1.03962	0.101002
ARPC1B	10095	J-012082-06	1.03405	0.0705916	0.146842	1.1827	0.0569056
ARPC1B	10095	J-012082-07	0.682672	0.04057	0.00175937	1.07626	0.0346266
ARPC1B	10095	J-012082-08	1.02262	0.093891	0.241814	1.13992	0.00398638
ARPC1B	10095	J-012082-09	0.678224	0.103019	0.0151727	1.05602	0.0344171
CLTA	1211	J-004002-05	0.917702	0.114883	0.239313	1.04467	0.054428
CLTA	1211	J-004002-06	0.502011	0.0548575	0.00293157	0.897996	0.0977301
CLTA	1211	J-004002-07	0.483599	0.124098	0.00870742	1.11939	0.0951791
CLTA	1211	J-004002-08	0.581108	0.00691194	0.000122095	1.04269	0.101672
CLTB	1212	J-004003-05	0.993696	0.0790188	0.394738	0.950506	0.244755
CLTB	1212	J-004003-06	0.0710668	0.0168419	9.45239e-06	0.905287	0.189516
CLTB	1212	J-004003-07	0.928688	0.0329446	0.0865595	1.11156	0.104742
CLTB	1212	J-004003-08	1.00498	0.0442159	0.213485	1.0449	0.0446925
CLTC	1213	J-004001-09	0.523333	0.0450925	0.0020124	0.975771	0.0781029
CLTC	1213	J-004001-10	0.395	0.0212132	0.00548756	1.12921	0.0217816
CLTC	1213	J-004001-11	0.66	0.0264575	0.00194175	1.05638	0.0671389
CLTC	1213	J-004001-12	0.585	0.0494975	0.0244373	1.03443	0.024361
AP1M1	8907	J-013196-05	0.996667	0.046188	0.262711	1.02159	0.00601861
AP1M1	8907	J-013196-06	0.0633333	0.0404145	0.000204833	1.01311	0.0512195
AP1M1	8907	J-013196-07	0.0866667	0.0251661	9.04744e-05	1.0132	0.0742448
AP1M1	8907	J-013196-08	1.02	0.0173205	0.0600587	1.05332	0.0531187
AP2A2	161	J-012812-05	0.837392	0.0225646	0.00827743	0.921915	0.146104
AP2A2	161	J-012812-06	0.988987	0.046502	0.384312	0.964193	0.0163457
AP2A2	161	J-012812-07	0.920271	0.0701711	0.150274	1.01788	0.145606
AP2A2	161	J-012812-08	0.393299	0.0255973	0.000425986	0.652833	0.0902825
SH3GLB1	51100	J-017086-05	1.0842	0.0230415	0.00575164	1.07301	0.0176548
SH3GLB1	51100	J-017086-06	0.274508	0.0137722	0.000180458	0.963793	0.143727
SH3GLB1	51100	J-017086-07	0.695655	0.0284518	0.000753797	1.1414	0.0346253
SH3GLB1	51100	J-017086-08	0.99246	0.113895	0.42982	1.03245	0.0677357
SH3GLB2	56904	J-015810-05	0.303333	0.0472582	0.000919586	1.09427	0.0240612
SH3GLB2	56904	J-015810-06	0.546667	0.0776745	0.00406238	1.08244	0.146212
SH3GLB2	56904	J-015810-07	0.963333	0.0550757	0.312088	1.11483	0.0644068
SH3GLB2	56904	J-015810-08	0.886667	0.0404145	0.0186701	1.00235	0.0299994
CIB2	10518	J-012230-05	0.513333	0.0288675	0.00109334	1.07392	0.159413
CIB2	10518	J-012230-06	0.0466667	0.0152753	0.000121129	0.554152	0.076047
CIB2	10518	J-012230-07	0.63	0.104403	0.0145751	1.27345	0.0430048
CIB2	10518	J-012230-08	0.666667	0.11547	0.0213542	1.216	0.0544771
VCP	7415	J-008727-09	0.64	0.0173205	0.000575705	1.13753	0.0670313
VCP	7415	J-008727-10	0.353333	0.0305505	0.000353292	1.18991	0.0943515
VCP	7415	J-008727-11	0.156667	0.0321455	0.000302958	1.14706	0.111095
VCP	7415	J-008727-12	0.45	0.0655744	0.00305705	1.13416	0.0373491
PIK4CA	5297	J-006776-13	0.653333	0.0568624	0.00345205	1.08239	0.161227
PIK4CA	5297	J-006776-14	0.576667	0.0550757	0.00217142	0.865447	0.0132602
PIK4CA	5297	J-006776-15	1.07667	0.0950438	0.11908	1.0614	0.00376804
PIK4CA	5297	J-006776-16	0.28	0.06	0.0010511	1.05268	0.0143462
RAB11A	8766	J-004726-07	0.69274	0.126304	0.0329457	0.954288	0.117534
RAB11A	8766	J-004726-08	0.666375	0.116744	0.0251808	1.30419	0.0367047
RAB11A	8766	J-004726-09	0.726947	0.0416664	0.0065626	1.0504	0.0624172
RAB11A	8766	J-004726-10	0.878816	0.0728933	0.0835704	0.966403	0.174943
RAB11B	9230	J-004727-06	0.897637	0.10286	0.132138	1.14926	0.221212
RAB11B	9230	J-004727-07	0.512704	0.106693	0.0070323	0.991229	0.110176
RAB11B	9230	J-004727-08	0.260872	0.0316657	0.000212152	0.893779	0.105993
RAB11B	9230	J-004727-09	0.820814	0.0711939	0.0237458	1.15478	0.243337
ITSN2	50618	J-009841-05	0.635584	0.0305433	0.00125947	1.01072	0.187678
ITSN2	50618	J-009841-06	0.368054	0.0339417	0.000559273	0.906123	0.209289
ITSN2	50618	J-009841-07	0.995995	0.0395301	0.279129	1.13627	0.137986
ITSN2	50618	J-009841-08	0.258909	0.17582	0.00874184	1.28098	0.112744
ARF6	382	J-004008-05	1.03271	0.0485426	0.0727072	0.940293	0.0599162
ARF6	382	J-004008-06	0.481939	0.213818	0.0276015	0.882039	0.0200391
ARF6	382	J-004008-07	0.721553	0.15002	0.0511765	1.08938	0.0731342
ARF6	382	J-004008-08	1.07875	0.0202923	0.00726227	0.935368	0.0706035
MAPK8IP1	9479	J-003595-05	1.05252	0.0675305	0.0910043	1.06633	0.110619
MAPK8IP1	9479	J-003595-06	0.921623	0.0695378	0.153357	1.09233	0.0999199
MAPK8IP1	9479	J-003595-07	1.15581	0.0247781	0.00125262	0.806104	0.230964
MAPK8IP1	9479	J-003595-08	0.353067	0.0651616	0.00236265	1.08708	0.13593
IHPK3	117283	J-006739-05	0.191057	0.0412098	0.00042708	0.820028	0.112867
IHPK3	117283	J-006739-06	1.03678	0.0335728	0.0747732	1.08232	0.127351
IHPK3	117283	J-006739-07	0.813998	0.0459598	0.0178126	1.20998	0.140905
IHPK3	117283	J-006739-08	1.17327	0.0458739	0.00742078	1.0248	0.141513
HIP1R	9026	J-027079-05	0.725691	0.112409	0.0256692	1.10867	0.234637
HIP1R	9026	J-027079-06	0.509992	0.182985	0.0215996	1.10938	0.0531582
HIP1R	9026	J-027079-07	0.977131	0.0696054	0.477916	1.15166	0.211039
HIP1R	9026	J-027079-08	0.918199	0.034429	0.0687616	1.00019	0.0899195
COPA	1314	J-011835-05	0.0434395	0.0335632	0.000113757	0.78862	0.139506
COPA	1314	J-011835-06	0.0671661	0.0526761	0.000548596	0.724686	0.0770159
COPA	1314	J-011835-07	0.0261949	0.0231454	0.000133232	0.633982	0.0712839
COPA	1314	J-011835-08	0.0361315	0.0386874	0.000421299	0.738229	0.067879
PSCD3	9265	J-019268-05	0.826667	0.0680686	0.0287439	1.13482	0.123929
PSCD3	9265	J-019268-06	0.976667	0.0450925	0.442265	1.22924	0.0315956
PSCD3	9265	J-019268-07	0.913333	0.106927	0.208394	1.12855	0.0675193
PSCD3	9265	J-019268-08	0.45	0.05	0.000946634	1.12227	0.0684171
RAB5A	5868	J-004009-05	0.42	0.08544	0.00300208	1.08208	0.145127
RAB5A	5868	J-004009-06	0.796667	0.0208167	0.00213501	1.14201	0.0824514
RAB5A	5868	J-004009-07	0.443333	0.125033	0.00952004	1.02429	0.0660261
RAB5A	5868	J-004009-08	0.72	0.01	0.000738008	1.1208	0.0259438
SEC13L1	6396	J-012351-05	0.491237	0.0781932	0.00454319	0.759405	0.0340268
SEC13L1	6396	J-012351-06	0.552401	0.0381315	0.000728689	1.02602	0.106301
SEC13L1	6396	J-012351-07	0.849058	0.0853605	0.0487361	0.851627	0.14142
SEC13L1	6396	J-012351-08	0.96245	0.0627092	0.327947	1.00404	0.176163
STAU	6780	J-011894-05	0.814646	0.0171491	0.000500959	0.874988	0.104741
STAU	6780	J-011894-06	0.900615	0.118276	0.192244	1.01312	0.143611
STAU	6780	J-011894-07	0.414946	0.0582375	0.00188925	1.06683	0.160148
STAU	6780	J-011894-08	1.02575	0.0354918	0.0944667	0.982003	0.120397
ARF1	375	J-011580-05	0.69	0.07	0.007	0.87	0.3
ARF1	375	J-011580-06	0.57	0.09	0.007	0.86	0.07
ARF1	375	J-011580-07	0.96	0.06	0.307	1.05	0.1
ARF1	375	J-011580-08	0.58	0.03	0.001	0.97	0.07
WASF2	10163	J-012141-05	0.887347	0.0360357	0.0162283	1.09931	0.218919
WASF2	10163	J-012141-06	0.974616	0.0741539	0.306676	1.06928	0.07065
WASF2	10163	J-012141-07	0.891521	0.087438	0.0823354	1.04852	0.0724272
WASF2	10163	J-012141-08	0.708281	0.0976889	0.0177033	1.00446	0.0751234
